# Supplementary material
Source: PubMed Central journal article supplement (PMC4378149)
Supplement: supp_pp.114.252338_252338supp.pdf [file supp_pp.114.252338_252338supp.pdf]

## Supplemental Tables

**Table I: PHT1 transporter family comparison at the amino acid level.** BLAST program was used to obtain percentage of similarity and identity (in bold).

|        | PHT1;1      | PHT1;2      | PHT1;3      | PHT1;4      | PHT1;5      | PHT1;6      | PHT1;7      | PHT1;8      | PHT1;9      |
|--------|-------------|-------------|-------------|-------------|-------------|-------------|-------------|-------------|-------------|
| PHT1;1 | <b>100%</b> | 100%        | 96%         | 87%         | 86%         | 80%         | 86%         | 63%         | 64%         |
| PHT1;2 | <b>99%</b>  | <b>100%</b> | 96%         | 87%         | 86%         | 80%         | 86%         | 64%         | 64%         |
| PHT1;3 | <b>94%</b>  | <b>94%</b>  | <b>100%</b> | 88%         | 86%         | 80%         | 88%         | 64%         | 64%         |
| PHT1;4 | <b>78%</b>  | <b>78%</b>  | <b>79%</b>  | <b>100%</b> | 88%         | 81%         | 94%         | 65%         | 66%         |
| PHT1;5 | <b>77%</b>  | <b>76%</b>  | <b>78%</b>  | <b>78%</b>  | <b>100%</b> | 78%         | 88%         | 63%         | 63%         |
| PHT1;6 | <b>68%</b>  | <b>68%</b>  | <b>67%</b>  | <b>67%</b>  | <b>64%</b>  | <b>100%</b> | 81%         | 61%         | 63%         |
| PHT1;7 | <b>78%</b>  | <b>78%</b>  | <b>79%</b>  | <b>90%</b>  | <b>78%</b>  | <b>69%</b>  | <b>100%</b> | 64%         | 65%         |
| PHT1;8 | <b>51%</b>  | <b>52%</b>  | <b>51%</b>  | <b>49%</b>  | <b>47%</b>  | <b>49%</b>  | <b>49%</b>  | <b>100%</b> | 87%         |
| PHT1;9 | <b>49%</b>  | <b>49%</b>  | <b>48%</b>  | <b>48%</b>  | <b>47%</b>  | <b>47%</b>  | <b>49%</b>  | <b>79%</b>  | <b>100%</b> |

**Table II: List of the primers used in qRT-PCR experiments.**

| Name or nb         | AGI                  | reverse                      | forward                    |
|--------------------|----------------------|------------------------------|----------------------------|
| <i>PHT1</i> ;1/1;2 | At5g43350/ At5g43370 | CAACTTGAGGAGGCGTTGA          | GGTTTTGGTTGGGATTTGG        |
| <i>PHT1</i> ;4     | At2g38940            | CCATCACAGCTTTTGGCTCATG       | CCTCGGTCGTATTTATTACCACG    |
| <i>PHT1</i> ;5     | At2g32830            | CTACCGGAATTTGCCACAGT         | CGTTGTTGATGCTTGCTTGT       |
| <i>PHT1</i> ;6     | At5g43340            | TGAAAAAGTAACCGGGAACG         | CCTTCGGCTAAAACCATGAA       |
| <i>PHT1</i> ;7     | At3g54700            | GTTCTGTTCTACCGGACATT         | TCCCTCATTGTTTTGGGTGT       |
| <i>PHT1</i> ;8     | At1g208606           | AAACGCCACCAAGAATCAAG         | TCCGGGCTAGGTTTAGGTCT       |
| <i>PHT1</i> ;9     | At1g764306           | ACTCATTGCGAGGAGACGAC         | AATCGCGTTTTTGATCCTTG       |
| 1                  | At1g67810            | TCATCCTCCCAAACCTCATCC        | TCACGGGATGTACGACTCAA       |
| 2                  | At5g67080            | ACACCGATGCGTAACAACAA         | AGTGGTAAAACGGCATGGAG       |
| 3                  | At2g04460            | GAGAATCTTTGCCGTCCAGA         | GATCGGTTTGCCCTCTACAA       |
| 4                  | At3g02870            | TTACCGGATGGATCAAAGATG        | CTTCTACGAGCTCGGTTTCG       |
| 5                  | At5g01220            | TGTGAGAGTTCATCGCCTTG         | TACCTGAAGCTCGGATTGCT       |
| 6                  | At1g08650            | GATCGAAACAGAGGGATGGA         | CTCTCTCCGACGACCTTGAC       |
| 7                  | At1g13750            | AAACTGGTGCCTTTGGATTG         | AGCGCCTGTCAAGTTTCAAT       |
| 8                  | At1g17710            | CAACGAGAGCAACCATGAGA         | TTAGGGTGCAGCTGAGAAT        |
| 9                  | At1g71130            | AGCAACCTCAGAAGCTCCAA         | TCGTCTCTGGCTGGGTACTT       |
| 10                 | At1g73010            | GACGACACGTGGATGAATTG         | TCATGATCAAGGCAAAAACCA      |
| 11                 | At2g11810            | CATCAGAGGATGCACGCTAA         | AGAGGCCGGTTTAAATGGAGT      |
| 12                 | At2g27190            | CAACGAACCTTCCCAAGTA          | TGAGATGAATCCGGGAAAAG       |
| 13                 | At2g30540            | GGCTTTCTCGATCTCACGAC         | CAAGAGCTCGTGTTCATGT        |
| 14                 | At2g45130            | CCTCCTCTTGTTCGTTGTC          | ATGGCGAAATGGTCTGCTA        |
| 15                 | At3g02040            | GTCGTCGGTTGCGACGCTCCACTT     | ACGGGCCACAGAGGGATACAGGCA   |
| 16                 | At3g05630            | TTTTGAAGCCGTTTCTTGCT         | TGCATTGCTGGAGACAAAAG       |
| 17                 | At3g43110            | TTGTCCCAACATGTCTCAA          | CGTGTACGTAACGGTGGTTG       |
| 18                 | At3g47420            | AGCAAAACCGTACCATCAGG         | CGCTGCAAGAAAAACAACAA       |
| 19                 | At4g03960            | CCTCTTGGAGCATGAGAAGG         | GCAGCTGCGAAAGCTAGAAT       |
| 20                 | At4g33030            | AGGCTCAAGTCCAAGTTCCA         | AGCTTGGGCTAGACGTGAAA       |
| 21                 | At5g20150            | GCGGCAATGAAAACACACTA         | CGGGTTTTGAAGGAGATCAG       |
| 22                 | At5g20410            | TGGTCCAGCTTTTGTGATGA         | ACAAGAAATTGGCATCTGCAT      |
| 23                 | At5g20790            | TATTAACGGCTCCGTTTTCG         | CGTCTCGAACCGAAATCAAT       |
| 24                 | At3g19970            | ACGCAGCTGAGAAAACCTGAT        | CGTCTTTCACACCTCAGCA        |
| 25                 | At3g51860            | GGCGATACCACAAAGAAGA          | GCGTTGGCCAATAACAAAGT       |
| 26                 | At5g64000            | CGCAGATCTCCAGTTTCCTC         | CAGCTGATTACGGCTCACAA       |
| 27                 | At3g55970            | TGCTCAGCATCTGAATTTGG         | TCGGTATCTCTCCGACTCT        |
| 28                 | At5g58310            | GCTGCTTGAAGGAGGAATTG         | GACAGGCAAGGACCATTTGT       |
| 29                 | At4g14090            | CGTTTGAACCACATCGTTTG         | TCTCTGCTACCGACGTATG        |
| 30                 | At1g52940            | GCGCTTGTTCCACAAACCGCCGTA     | TCAACCCGAAAGGCCAAGCGGTGC   |
| 31                 | At1g35910            | CAATGGGGGATAATGTACCG         | CCCGTCAGCTTTAACCATGT       |
| 32                 | At4g10120            | TGAGATCCGCCATTCTCTTT         | GCCTCCACAAAACCATCATT       |
| 33                 | At1g03170            | CCACTCTCGCTTCTGTTTC          | AGCTTATGTTACCCGATGG        |
| 34                 | At2g42690            | AAGATCCTGGCACCAAACAC         | TAGCTGGATGGAATGGGAAG       |
| 35                 | At4g15210            | CATAGCAACCCCGTACGTTT         | GGCATTGCAACTTTAAGAGG       |
| 36                 | At1g68740            | GCCACCACAAGACAGAGCCAACCAAGGC | AGCAATGCAGTGTGCAAGGAGGTGGT |
| 37                 | At1g20860            | AAACGCCACCAAGAATCAAG         | TCCGGGCTAGGTTTAGGTCT       |
| 38                 | At5g17340            | CGGGTGAAGCCGGCTGGGATTGG      | TGGCCATCCCCACCACCGGAAAGG   |
| 39                 | At4g30320            | GCTCCTTGCTTCAGACAACC         | CCAATGGACCCTATGGTGAG       |
| 40                 | At3g09922            | CGAAGCTTGCCAAAGGATAG         | TGAAGACTGCAGAAGGCTGA       |

## Supplemental Figure Legends

**Figure 1. Pi content, qPCR, <sup>33</sup>P uptake and partitioning in triple mutant lines.** **A.** Pi dosage content in leaves (grey bars) and roots (white bars) of 11 dpg plantlets grown in +P. Standard deviations are shown. At least two independent experiments gave similar results. **B.** Relative gene expression level (qRT-PCR) in roots of single *pht1;1* and triple mutant lines grown in -P, including a WT control grown in +P. **C.** <sup>33</sup>P uptake capacity for single and triple mutant lines, grown in -P. **D.** <sup>33</sup>Pi partitioning for single and triple mutant lines, grown in -P. **E.** Relative gene expression (qRT-PCR) in *mut3* lines in +P conditions, including a WT control in -P.

**Figure 2. Pi content, <sup>31</sup>P-NMR spectra and mineral content in *mut4* and *mut5* lines.** **A.** Pi dosage content in leaves (grey bars) and roots (white bars) with 11 dpg plantlets grown in +P. Standard deviations are shown. **B.** *In vivo* proton-decoupled <sup>31</sup>P-NMR spectra reveal a dramatic reduction in cytoplasmic and vacuolar P in roots of *mut5* lines. Acquisition time was 1 h (6,000 scans). Peak assignments are as follows: ref, methylenediphosphonate reference used to measure chemical shifts and for quantifications; glc-6-P, Glucose-6-phosphate; cyt-Pi, cytoplasmic Pi; vac-Pi, vacuolar Pi; NTP, nucleoside triphosphate; UDP-glc, uridine-5'-diphosphate- $\alpha$ -D-glucose. **C.** ICP analysis of *mut5* lines reveals a selective drop in total P in leaves (L) and roots (R) of 2-week-old plantlets. For each panel, data shown are from a representative experiment; experiments were performed in triplicate.

**Figure 3. qRT-PCR of *mut5* lines reveals a general induction of PSI genes.** qRT-PCR of 40 Pi starvation-induced genes in two independent *mut5* lines and in WT grown in +P and -P conditions. Corresponding ATG numbers and primer sequences are provided in Supplemental Table II. Biological triplicates were performed and all samples were analyzed with technical triplicates. Standard deviations are shown.

**Figure 4. *In vitro* phenotype of *mut4* and *mut5* lines on -P medium containing 10  $\mu$ M Fe reveals full perception of P deficiency.** **A.** Growth arrest of the primary root is observed in all lines when grown in -P medium with 10  $\mu$ M Fe. Photographs were taken at 7 dpg. Scale bar is 1 cm. **B.** Detail of the root tips of plantlets photographed in A. Scale bar is 1 mm. **C.** Primary root length in mm. **D.** Number of root hair in 5 mm region from primary root tip. **E.** Length from primary root tip to the youngest root air, in mm. For C to E panels, measurements were done at 7 dpg in +P (white bars) and -P (grey bars) media, using 20 plants per genotype and condition. Bilateral T-tests were conducted to assess statistical differences between WT and the other genotypes, comparing the +P growing plants with +P growing WT, and -P growing plants to -P growing WT. \* stands for p value < 0.01. **F.**

Anthocyanin content (arbitrary units) in leaves of *mut4* and *mut5* lines show Pi deficiency perception in standard +P conditions and reestablishment of WT anthocyanin levels in VHPi conditions.

**Figure 5. Flowering time, grain yield and seed size are affected in quintuple mutant lines. A.** Flowering time delay in *mut5* lines. Two independent *mut5* lines are shown (in the right) in comparison with 8 WT plants (on the left) grown on the same support and conditions. **B.** Seed yield is reduced in *mut5* lines. **C.** Seed size and weight are reduced in *mut5* lines. Average seed weight was calculated as an average, using 200 seeds per genotype, whereas seed size was measured by light microscopy (n = 30 to 45 seeds per genotype). White triangle: WT. Pale grey square: *mut5-1*. Dark grey lozenge: *mut5-2*.

**Figure 6. CCCP addition inhibits both <sup>33</sup>Pi uptake and roots-to-leaves translocation.** Plants were grown for 10 days (WT) or 14 days (*mut5*) on -P before <sup>33</sup>P uptake in control (white bars), +CCCP (grey bars) and 1 μL/mL DMSO (hatched bars) conditions. Pi uptake capacity was calculated as nmol Pi/h/cm of root. Data shown are from a representative experiment; experiments were performed in triplicate. Each bar corresponds to 20 to 24 plants. Error bars represent standard error.

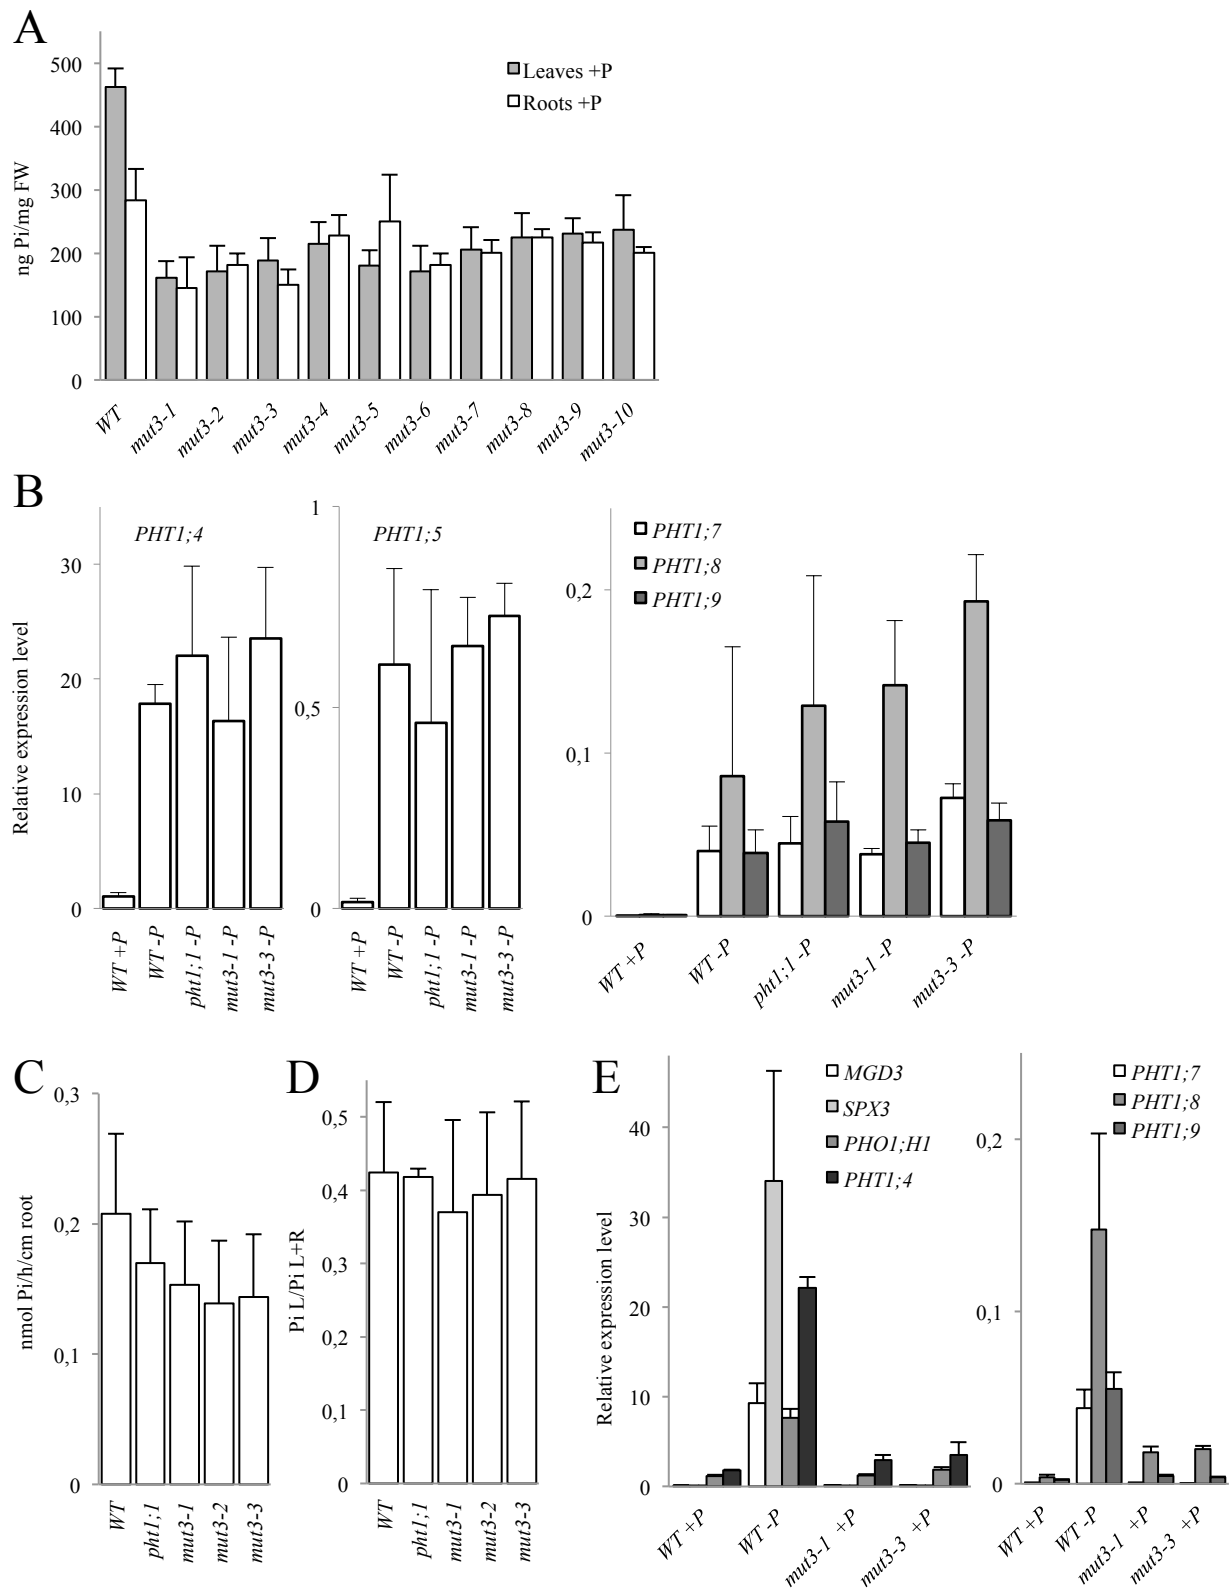

**Figure 1. Pi content, qPCR, <sup>33</sup>P uptake and partitioning in triple mutant lines.** **A.** Pi dosage content in leaves (grey bars) and roots (white bars) of 11 dpw plantlets grown in +P. Standard deviations are shown. At least two independent experiments gave similar results. **B.** Relative gene expression level (qRT-PCR) in roots of single *phl1;1* and triple mutant lines grown in -P, including a WT control grown in +P. **C.** <sup>33</sup>P uptake capacity for single and triple mutant lines, grown in -P. **D.** <sup>33</sup>Pi partitioning for single and triple mutant lines, grown in -P. **E.** Relative gene expression (qRT-PCR) in *mut3* lines in +P conditions, including a WT control in -P.

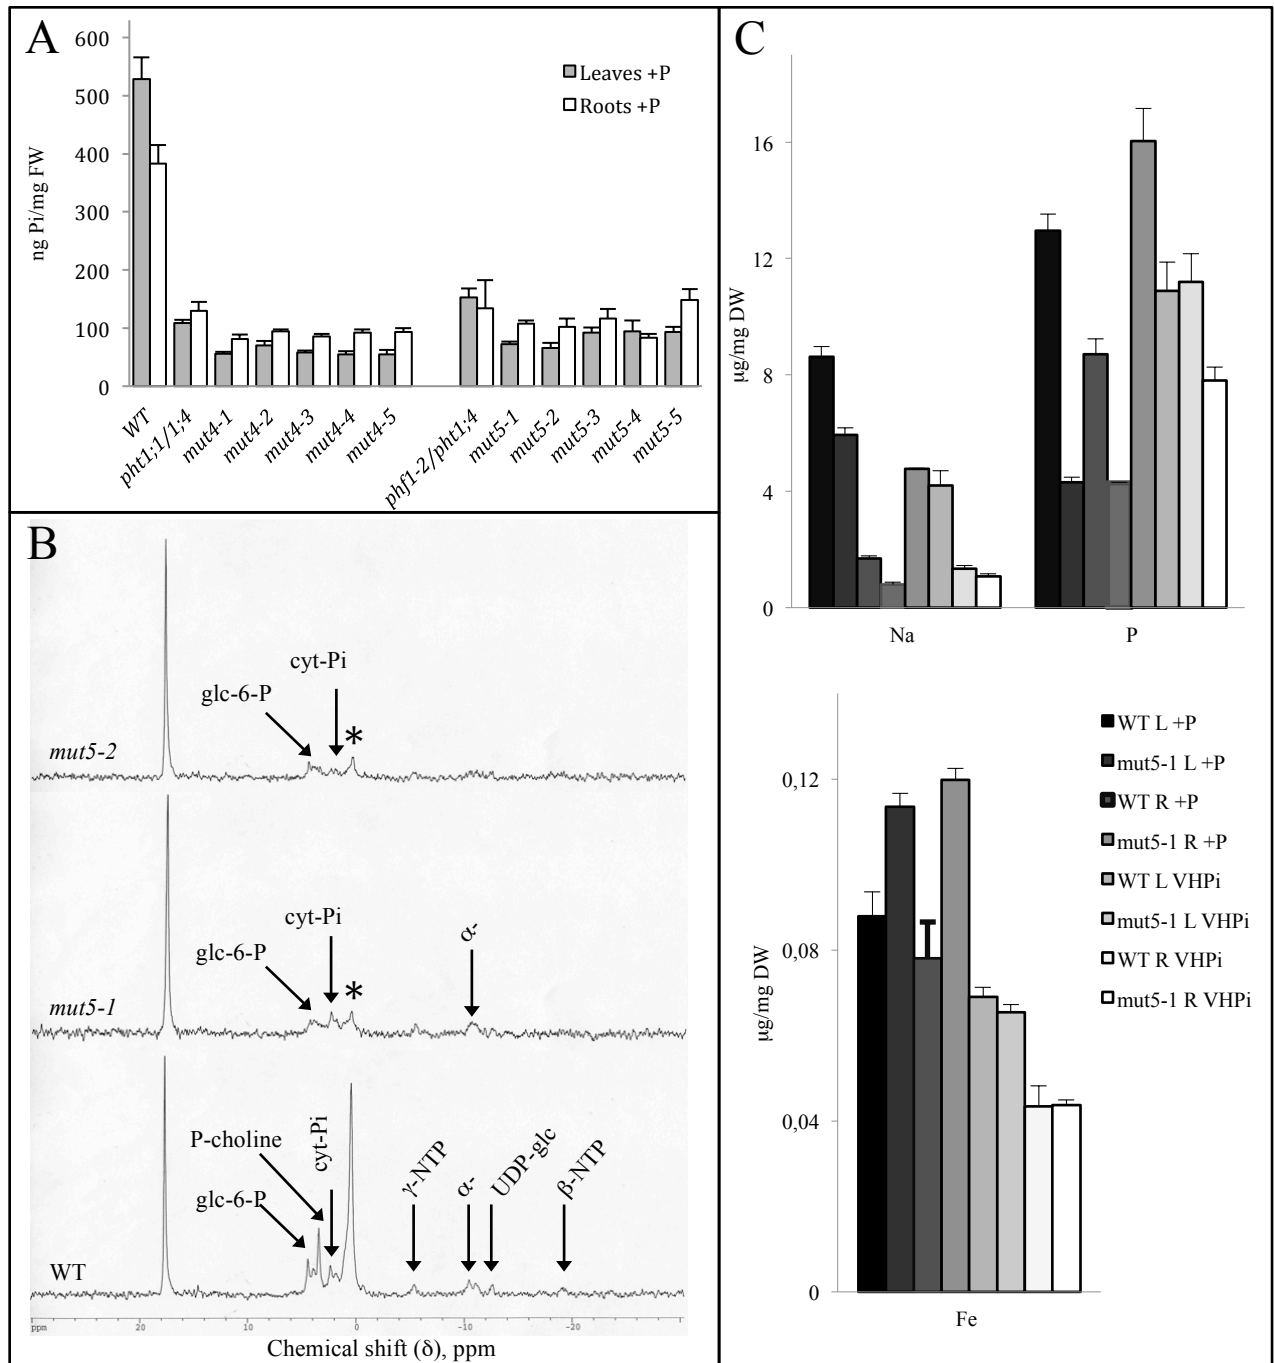

**Figure 2. Pi content,  $^{31}\text{P}$ -NMR spectra and mineral content in *mut4* and *mut5* lines.** **A.** Pi dosage content in leaves (grey bars) and roots (white bars) with 11 dpg plantlets grown in +P. Standard deviations are shown. **B.** *In vivo* proton-decoupled  $^{31}\text{P}$ -NMR spectra reveal a dramatic reduction in cytoplasmic and vacuolar P in roots of *mut5* lines. Acquisition time was 1 h (6,000 scans). Peak assignments are as follows: ref, methylenediphosphonate reference used to measure chemical shifts and for quantifications; glc-6-P, Glucose-6-phosphate; cyt-Pi, cytoplasmic Pi; vac-Pi, vacuolar Pi; NTP, nucleoside triphosphate; UDP-glc, uridine-5'-diphosphate- $\alpha$ -D-glucose. **C.** ICP analysis of *mut5* lines reveals a selective drop in total P in leaves (L) and roots (R) of 2-week-old plantlets. For each panel, data shown are from a representative experiment; experiments were performed in triplicate.

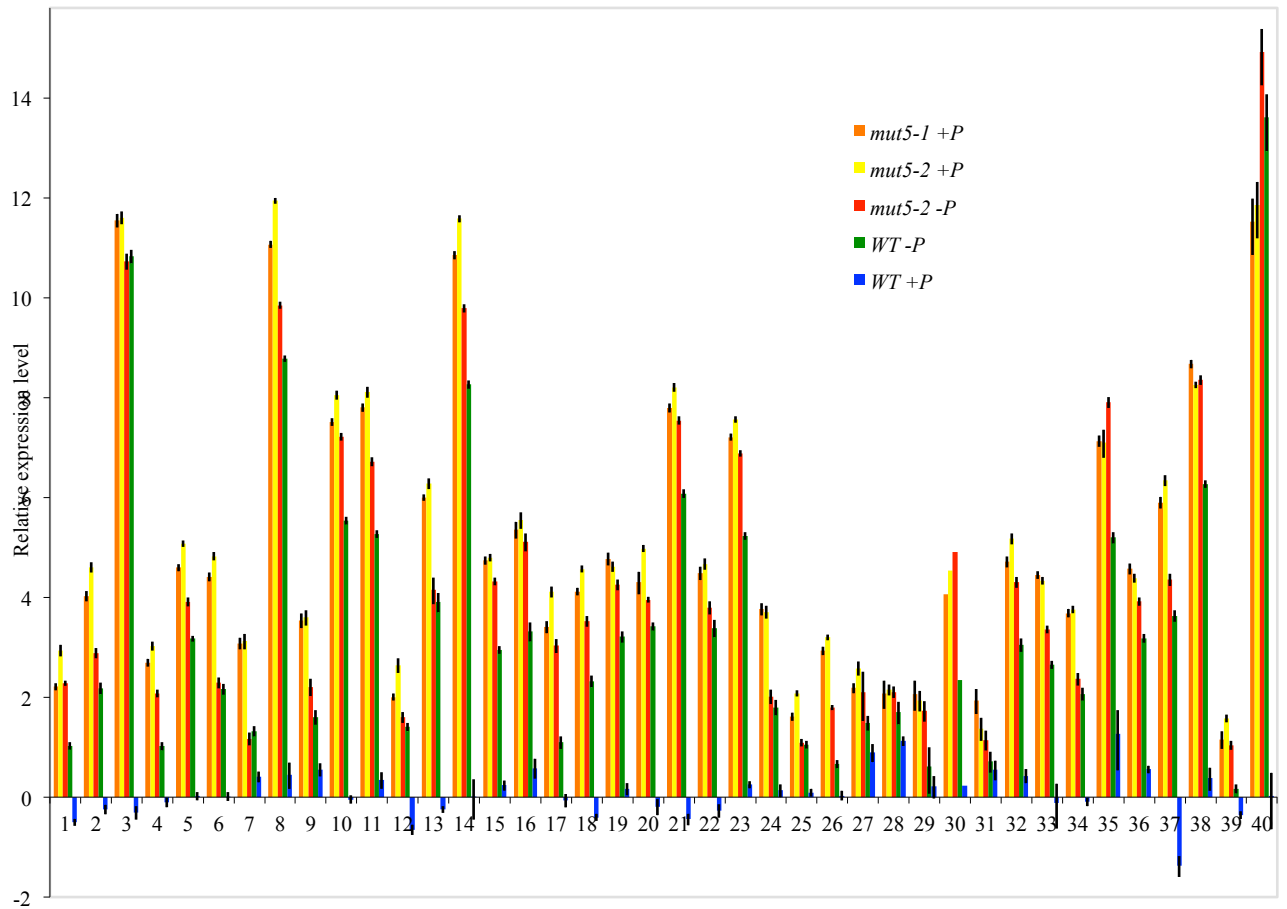

**Figure 3. qRT-PCR of *mut5* lines reveals a general induction of PSI genes.** qRT-PCR of 40 Pi starvation-induced genes in two independent *mut5* lines and in WT grown in +P and -P conditions. Corresponding ATG numbers and primer sequences are provided in Supplemental Table II. Biological triplicates were performed and all samples were analyzed with technical triplicates. Standard deviations are shown.

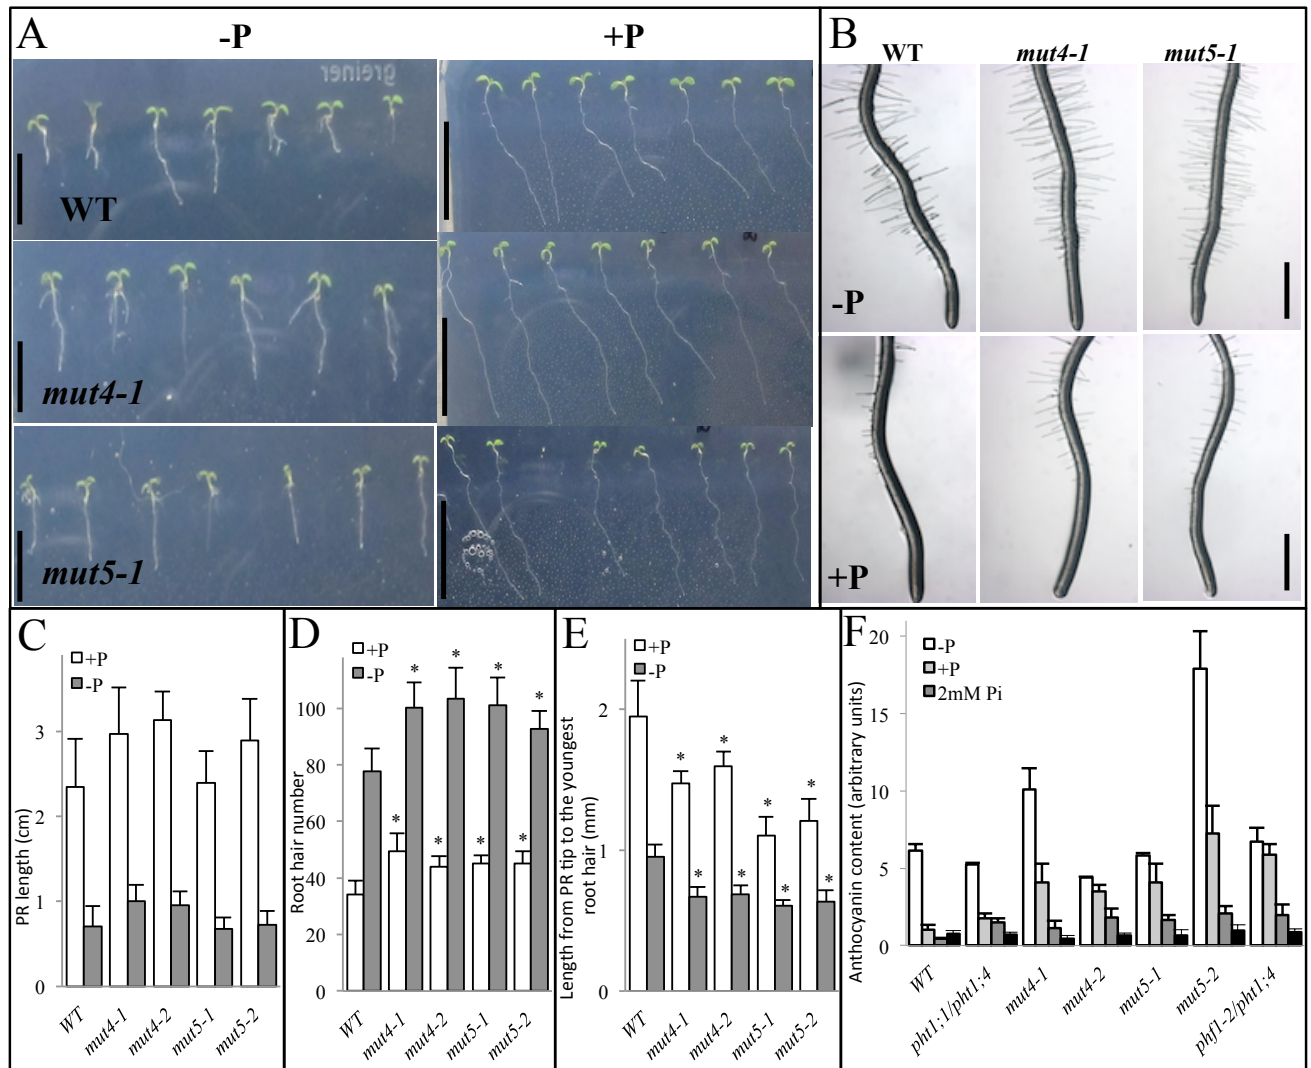

**Figure 4.** *In vitro* phenotype of *mut4* and *mut5* lines on -P medium containing 10  $\mu$ M Fe reveals full perception of P deficiency. **A.** Growth arrest of the primary root is observed in all lines when grown in -P medium with 10  $\mu$ M Fe. Photographs were taken at 7 dpg. Scale bar is 1 mm. **C.** Primary root length in mm. **D.** Number of root hair in 5 mm region from primary root tip. **E.** Length from primary root tip to the youngest root hair, in mm. For C to E panels, measurements were done at 7 dpg in +P (white bars) and -P (grey bars) media, using 20 plants per genotype and condition. Bilateral T-tests were conducted to assess statistical differences between WT and the other genotypes, comparing the +P growing plants with +P growing WT, and -P growing plants to -P growing WT. \* stands for p value < 0.01. **F.** Anthocyanin content in leaves of *mut4* and *mut5* lines show Pi deficiency perception in standard +P conditions and reestablishment of WT anthocyanin levels in VHPi conditions.



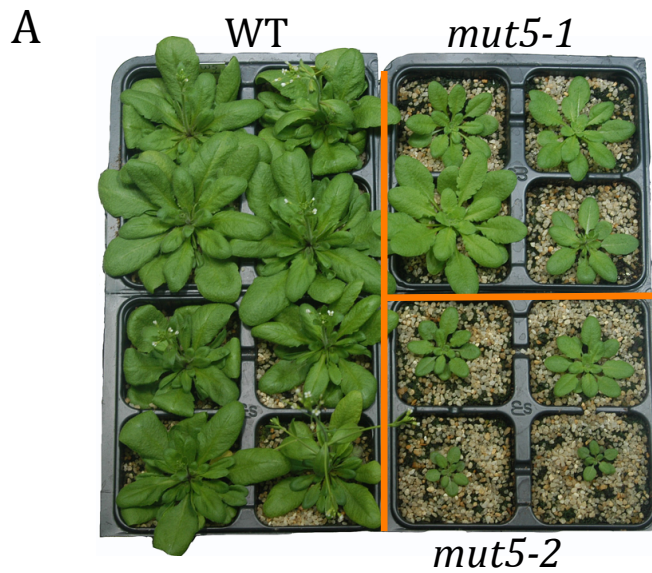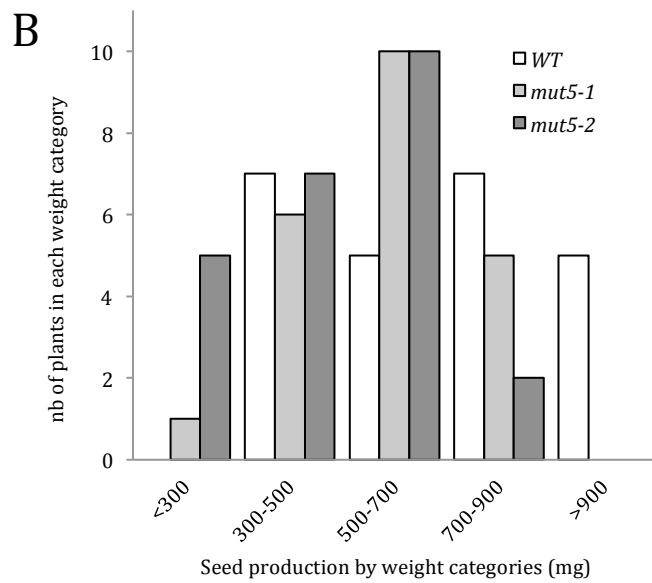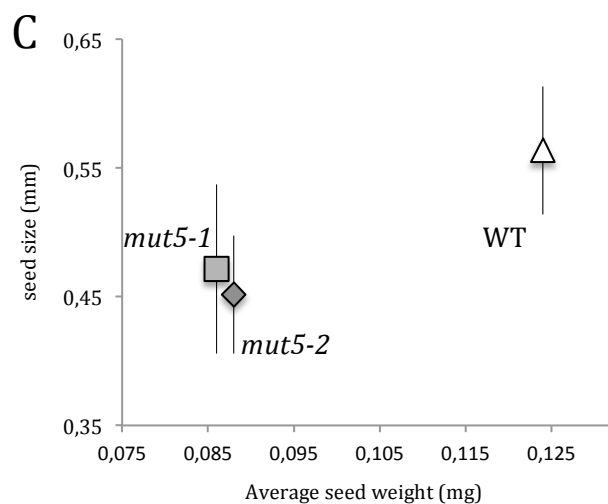

**Figure 5. Flowering time, grain yield and seed size are affected in quintuple mutant lines. A.** Flowering time delay in *mut5* lines. Two independent *mut5* lines are shown (in the right) in comparison with 8 WT plants (on the left) grown on the same support and conditions. **B.** Seed yield is reduced in *mut5* lines. **C.** Seed size and weight are reduced in *mut5* lines. Average seed weight was calculated as an average, using 200 seeds per genotype, whereas seed size was measured by light microscopy (n = 30 to 45 seeds per genotype). White triangle: WT. Pale grey square: *mut5-1*. Dark grey lozenge: *mut5-2*.

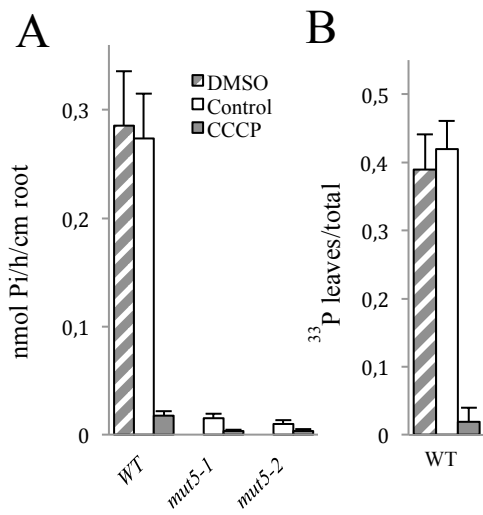

**Figure 6. CCCP addition inhibits both <sup>33</sup>Pi uptake and roots-to-leaves translocation.** Plants were grown for 10 days (WT) or 14 days (*mut5*) on -P before <sup>33</sup>P uptake in control (white bars), +CCCP (grey bars) and 1  $\mu$ L/mL DMSO (hatched bars) conditions. Pi uptake capacity was calculated as nmol Pi/h/cm of root. Data shown are from a representative experiment; experiments were performed in triplicate. Each bar corresponds to 20 to 24 plants. Error bars represent standard error.
